# Supplementary material for: Lower-Sized Chitosan Nanocapsules for Transcutaneous Antigen Delivery
Source: PubMed Central journal article supplement (PMC6164329; doi:10.3390/nano8090659), 2018-08-26
Supplement: nanomaterials-08-00659-s001.pdf [file nanomaterials-08-00659-s001.pdf]

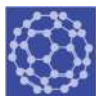

# Supplementary Materials

Table S1: Component and amount used in the experimental design.

| Component            | Function   | Composition |    |     |
|----------------------|------------|-------------|----|-----|
| Vitamin E (mg)       | oil        | 30          | 60 | 120 |
| Lipocol HCO-40 (mg)  | Surfactant | 25          | 50 | 100 |
| Emulphor FAS-30 (µL) |            | 5           | 10 | 20  |

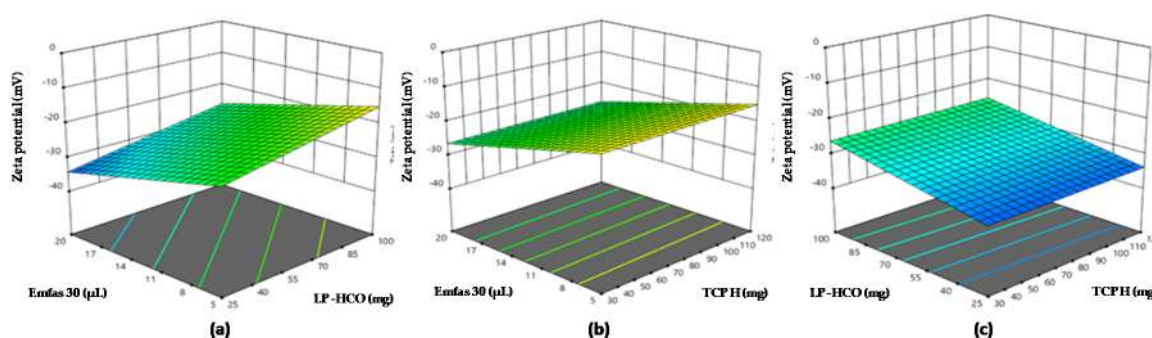

Figure S1: Influence of mass of Lipocol HCO-40 (LP-HCO), Vitamin E (TCPH) and the volume of Emulphor FAS-30 (EmFas-30) on the zeta potential of nanoemulsiones. (a): The amount of TCFH remained constant (60 mg). (b): The amount of LP-HCO remained constant (100 mg). (c): The amount of EmFas-30 remained constant (20 µL).

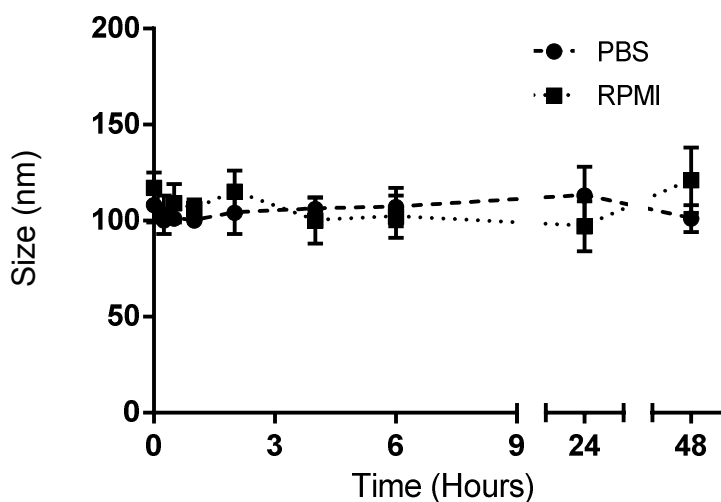

Figure S2: Stability of chitosan nanocapsules in physiological (PBS) and media (supplemented RPMI) conditions. (37°C and pH=7.4) for 48 h. (mean ± SD, n=3).

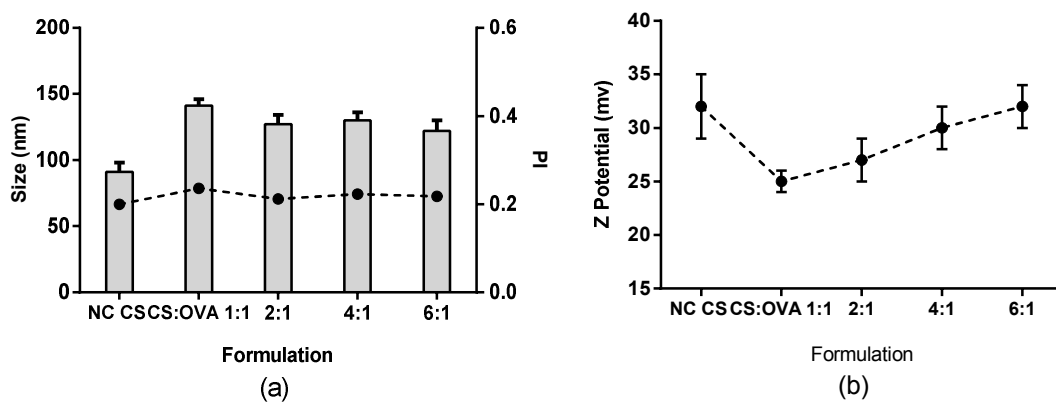

**Figure S3:** Physicochemical properties of blank chitosan nanocapsules (CS NC) and OVA-loaded chitosan nanocapsules (CS NC:OVA) in different proportions (1:1; 2:1; 4:1; 6:1 chitosan:OVA mass ratio). A: Size and polydispersity index (PI) and B= zeta potential.
